# Supplementary material
Source: HighWire-hosted journal article supplement (https://hw-f5-jim.highwire.org/content/65/3/681)
Supplement: inline-supplementary-material-1 [file inline-supplementary-material-1.pdf]

## **Supplementary Material**

### **Shared Decision Making Following Disclosure of Coronary Heart Disease Genetic Risk: Results from a Randomized Clinical Trial**

Hayan Jouni, MD, Raad A. Haddad, MBBS, Tariq S. Marroush, MD, Sherry-Ann Brown, MD, PhD,  
Teresa M. Kruisselbrink, CGC, Erin E. Austin, PhD, Khader Shameer, PhD, Emma M. Heim, BA, Rajeev  
Chaudhry, MBBS, MPH, Victor M. Montori, MD, Iftikhar J. Kullo, MD

From the Division of Cardiovascular Diseases, Department of Medicine, Mayo Clinic, Rochester MN  
(HJ, RAH, TSM, SAB, TMK, EEA, KS, IJK); the Knowledge and Evaluation Research Unit, Mayo  
Clinic, Rochester MN (EMH, VMM); and the Division of Primary Care Internal Medicine and  
Knowledge Delivery Center, Mayo Clinic, Rochester MN (RC)

**Supplementary Table 1. *Genetic Loci Associated with Coronary Heart Disease Used in Genetic Risk Score Calculation***

**Supplementary Figure 1. *Generic Disease Management Interface in the Electronic Health Record***

A sample of how the generic disease management interface appears in the electronic health record for a hypothetical patient at intermediate risk for CAD. GDMS summarizes pertinent information such as the most recent vitals, laboratory studies, Framingham risk score, and preventive measures. It also provides alerts regarding recommended actions as well as links to resources and guidelines. The red box above highlights the 10-year Framingham risk score and associated link that takes the provider to the statin decision aid tool simultaneously transmitting the relevant risk factors and laboratory values.

**Supplementary Figure 2. *Sample risk report as deposited in the electronic health record***

This figure displays a sample CHD risk report for a hypothetical study participant randomized to receive CRS\*GRS. The first page lists the study participant's demographics, risk factors, family history of premature CHD, and conventional risk for CHD based on Framingham risk score. It also lists the genetic risk score (GRS) and the overall CHD risk taking into account the study participant's GRS. The second page of the risk report lists the alleles at each risk locus.

**Supplementary Table 1. Genetic Loci Associated with CHD Risk**

| Gene                         | SNP        | CHR | Risk Allele | Risk Allele OR |
|------------------------------|------------|-----|-------------|----------------|
| <i>MIA3</i>                  | rs17465637 | 1   | C           | 1.14           |
| <i>PPAP2B</i>                | rs17114036 | 1   | A           | 1.11           |
| <i>IL6R</i>                  | rs4845625  | 1   | T           | 1.04           |
| <i>WDR12</i>                 | rs6725887  | 2   | C           | 1.12           |
| * <i>ZEB2-AC074093.1</i>     | rs2252641  | 2   | G           | 1.04           |
| * <i>VAMP5-VAMP8-GGCX</i>    | rs1561198  | 2   | A           | 1.05           |
| <i>MRAS</i>                  | rs9818870  | 3   | T           | 1.07           |
| <i>EDNRA</i>                 | rs1878406  | 4   | T           | 1.06           |
| * <i>SLC22A4-SLC22A5</i>     | rs273909   | 5   | C           | 1.09           |
| <i>TCF21</i>                 | rs12190287 | 6   | C           | 1.07           |
| <i>PHACTR1</i>               | rs9369640  | 6   | A           | 1.09           |
| <i>KCNK5</i>                 | rs10947789 | 6   | T           | 1.06           |
| <i>PLG</i>                   | rs4252120  | 6   | T           | 1.06           |
| <i>ANKS1A</i>                | rs17609940 | 6   | G           | 1.07           |
| 7q22 <i>BCAP29</i>           | rs10953541 | 7   | C           | 1.08           |
| * <i>HDAC9</i>               | rs2023938  | 7   | G           | 1.07           |
| <i>CDKN2BAS1</i>             | rs1333049  | 9   | C           | 1.23           |
| * <i>CXCL12</i>              | rs2047009  | 10  | C           | 1.05           |
| <i>KIAA1462</i>              | rs2505083  | 10  | C           | 1.06           |
| <i>PDGFD</i>                 | rs974819   | 11  | A           | 1.07           |
| <i>COL4A1-COL4A2</i>         | rs4773144  | 13  | G           | 1.07           |
| <i>COL4A1-COL4A2</i>         | †rs9515203 | 13  | T           | 1.08           |
| <i>FLT1</i>                  | rs9319428  | 13  | A           | 1.05           |
| <i>HHIPL1</i>                | rs2895811  | 14  | C           | 1.06           |
| <i>RAI1-PEMT-RASD1</i>       | rs12936587 | 17  | G           | 1.06           |
| <i>SMG6</i>                  | rs216172   | 17  | C           | 1.07           |
| <i>UBE2Z</i>                 | rs46522    | 17  | T           | 1.06           |
| Gene desert ( <i>KCNE2</i> ) | rs9982601  | 21  | T           | 1.13           |

CHD: coronary artery disease; CHR: Chromosome; OR: odds ratio. \* Reverse complement of these SNPs was used to match the reported risk alleles. † rs9515203 had an r2 of 0.01 with rs4773144.

Welcome, Hayan Jouni | Logout Powered by VitaHealth Software 

## Generic Disease Management System

### Summary for diseases and preventive services

Birth date: 09/10/1967 | Age: 46 | Male  Female

Prim. Phys.

Has:

Last blood pressure: 160/83 | Date: 03/27/2014

Last height: 162.8 cm | Date: 02/18/2014

Last weight: 76.9 kg | Date: 03/27/2014

Last BMI: 29 | Date: 03/27/2014

PHQ-9 score:  | Date:

Last Asthma Action Plan:

Current tobacco use:  | Last CVI: 02/12/2014

Last advance directive:

Last echo:

Last ECG: 03/21/2014

Last nuclearstudy:

ERA Score:

Ejection Fraction: 65%

**Framingham score: 10%**

Major Fx 10 yr risk:

Hip Fx 10 yr risk:

**Labs for past 5 years** History

|                   | Normal value | Most recent value | mm/dd/yyyy |                                                                    |
|-------------------|--------------|-------------------|------------|--------------------------------------------------------------------|
| Hemoglobin        | 12.0 - 15.5  | 10.6 * g/dL       | 03/21/2014 | <input type="button" value="An"/> <input type="button" value="H"/> |
| Sodium            | 135 - 145    | 137 mmol/L        | 03/10/2014 | <input type="button" value="An"/> <input type="button" value="H"/> |
| Potassium         | 3.6 - 5.2    | 3.6 mmol/L        | 03/10/2014 | <input type="button" value="An"/> <input type="button" value="H"/> |
| Glucose           | 70 - 100     | 111 mg/dL         | 02/12/2014 | <input type="button" value="An"/> <input type="button" value="H"/> |
| HbA1c             |              |                   |            | <input type="button" value="An"/> <input type="button" value="H"/> |
| AST (SGOT)        | 8 - 43       | 31 U/L            | 02/12/2014 | <input type="button" value="An"/> <input type="button" value="H"/> |
| ALT (SGPT)        |              |                   |            | <input type="button" value="An"/> <input type="button" value="H"/> |
| Creatinine        | 0.8 - 1.1    | 0.6 mg/dL         | 03/10/2014 | <input type="button" value="An"/> <input type="button" value="H"/> |
| eGFR              | >60          | >60 mL/min/E      | 03/10/2014 | <input type="button" value="An"/> <input type="button" value="H"/> |
| Total cholesterol | SeeComment   | 131 mg/dL         | 02/12/2014 | <input type="button" value="An"/> <input type="button" value="H"/> |
| Triglycerides     | SeeComment   | 89 mg/dL          | 02/12/2014 | <input type="button" value="An"/> <input type="button" value="H"/> |
| HDL cholesterol   | SeeComment   | 28 * mg/dL        | 02/12/2014 | <input type="button" value="An"/> <input type="button" value="H"/> |
| LDL cholesterol   | SeeComment   | 65 mg/dL          | 02/12/2014 | <input type="button" value="An"/> <input type="button" value="H"/> |
| hsCRP             |              |                   |            | <input type="button" value="An"/> <input type="button" value="H"/> |
| Lipoprotein(a)    |              |                   |            | <input type="button" value="An"/> <input type="button" value="H"/> |
| INR               |              |                   |            | <input type="button" value="An"/> <input type="button" value="H"/> |

**Recommended actions**

---

**Rec. actions next 90 days**

**Preventive services** Hist.

Tdap vaccine: 02/12/2014

Influenza vaccine: 02/12/2014

Pneumococcal vaccine: 02/12/2014

**AME, CPM's, Patient education and Decision aids**

[My Road to Better Health](#)

[Daily Weight Diary](#)

[Know Your Risk Factors for Coronary Artery Disease](#)

**Alerts**

Advise lifestyle counseling as BMI > 25

Supplementary Figure 1.

## Coronary Heart Disease Genetic Risk Report

Clinic Number: 1-234-567      Birthdate: 10/01/1952  
 Name: Jane Doe      Date: 01/01/2014  
 Age: 61      Provider: Iftikhar J. Kullo, M.D.  
 Gender: F      Service: Cardiovascular Diseases

The patient was genotyped for 28 single nucleotide polymorphisms (SNPs) associated with coronary heart disease (CHD).

|                                                      |                                                                     |
|------------------------------------------------------|---------------------------------------------------------------------|
| <b>Genetic Risk Score (GRS):</b>                     | <b>1.47</b>                                                         |
| <b>10-year probability of CHD (FRS):</b>             | <b>7%</b>                                                           |
| <b>Overall 10-year probability of CHD (FRSxGRS):</b> | <b>10.26%</b>                                                       |
| <b>Family History of CHD:</b>                        | <input checked="" type="checkbox"/> Yes <input type="checkbox"/> No |

\*\* All parameters, including age, based upon initial study visit.  
 \*Smoking: no; DM: no; SBP: 152; DBP: 80; HDL: 83; TC: 205

**Interpretation:** Compared to the population average, this patient has a **47% higher** genetic risk for CHD. **Note:** Risk for CHD is probabilistic, not deterministic. Risk variants for CHD were selected from published genome-wide association studies (GWAS) excluding the variants associated with hypertension and lipid levels.<sup>1-2</sup> The genetic risk score was calculated as previously reported<sup>3</sup> assuming additive effects of the risk alleles. FRS = Framingham risk score.

Signed by Iftikhar J. Kullo, M.D.

### Additional information related to the genetic risk score (GRS)

- Odds ratios may over-estimate risk in the context of common diseases such as CHD.
- Genetic risk scores may need to be periodically updated as new susceptibility variants are identified.
- The SNPs used in this report were identified in adults of European ancestry; use of these SNPs may not apply uniformly to adults of other ethnic groups.
- 10-year probability of CHD was calculated based on Wilson et al.<sup>4</sup>

### References

- Deloukas P et al. Large-scale association analysis identifies new risk loci for coronary artery disease. *Nat Genet.* 2013; 45(1):25-33.
- C4D Group. A genome-wide association study in Europeans and south Asians identifies five new loci for coronary artery disease. *Nat Genet.* 2011; 43:339-344
- Ding K et al. Genotype-informed estimation of risk of coronary heart disease based on genome-wide association data linked to the electronic medical record. *BMC Cardiovasc Disord.* 2011 Nov 3;11:66.
- Wilson PW et al. Prediction of coronary heart disease using risk factor categories. *Circulation.* 1998; 12:97(18):1837-47.

### Genotypes at 28 loci associated with CHD

| Gene                | SNP        | CHR | Risk Allele | Risk Allele OR | Genotype |
|---------------------|------------|-----|-------------|----------------|----------|
| MIA3                | rs17465637 | 1   | C           | 1.14           | CC       |
| PPAP2B              | rs17114036 | 1   | A           | 1.11           | AG       |
| IL6R                | rs4845625  | 1   | T           | 1.04           | TT       |
| WDR12               | rs6725887  | 2   | C           | 1.12           | TT       |
| *ZEB2-AC074093.1    | rs2252641  | 2   | G           | 1.04           | AG       |
| *VAMP5-VAMP8-GGCX   | rs1561198  | 2   | A           | 1.05           | AA       |
| MRAS                | rs9818870  | 3   | T           | 1.07           | CC       |
| EDNRA               | rs1878406  | 4   | T           | 1.06           | TT       |
| *SLC22A4-SLC22A5    | rs273909   | 5   | C           | 1.09           | TT       |
| TCF21               | rs12190287 | 6   | C           | 1.07           | CC       |
| PHACTR1             | rs9369640  | 6   | A           | 1.09           | AA       |
| KCNK5               | rs10947789 | 6   | T           | 1.06           | CT       |
| PLG                 | rs4252120  | 6   | T           | 1.06           | TT       |
| ANKS1A              | rs17609940 | 6   | G           | 1.07           | GG       |
| 7q22 BCAP29         | rs10953541 | 7   | C           | 1.08           | CC       |
| *HDAC9              | rs2023938  | 7   | G           | 1.07           | AA       |
| CDKN2BAS1           | rs1333049  | 9   | C           | 1.23           | CG       |
| *CXCL12             | rs2047009  | 10  | C           | 1.05           | AC       |
| KIAA1462            | rs2505083  | 10  | C           | 1.06           | CT       |
| PDGFD               | rs974819   | 11  | A           | 1.07           | AG       |
| COL4A1-COL4A2       | rs4773144  | 13  | G           | 1.07           | AA       |
| COL4A1-COL4A2       | *rs9515203 | 13  | T           | 1.08           | TT       |
| FLT1                | rs9319428  | 13  | A           | 1.05           | AA       |
| HHIPL1              | rs2895811  | 14  | C           | 1.06           | CC       |
| RAI1-PEMT-RASD1     | rs12936587 | 17  | G           | 1.06           | AG       |
| SMG6                | rs216172   | 17  | C           | 1.07           | GG       |
| UBE2Z               | rs46522    | 17  | T           | 1.06           | TT       |
| Gene desert (KCNE2) | rs9982601  | 21  | T           | 1.13           | CC       |

CHD: coronary heart disease; CHR: Chromosome; OR: odds ratio; \* Reverse complement of these SNPs was used to match the reported risk alleles. † rs9515203 had an  $r^2$  of 0.01 with rs4773144.  
 SNPs associated with CHD and also with hypertension and lipid levels are not included in this list.  
 Genotyping was performed at the Clinical Laboratory Improvement Amendments (CLIA)-certified Advanced Genomics Laboratory, Medical College of Wisconsin, Milwaukee WI (see appended report).

## Supplementary Figure 2.
